# Supplementary material for: Association of Data Integration Technologies With Intensive Care Clinician Performance: A Systematic Review and Meta-analysis
Source: PubMed Central journal article supplement (PMC6632132; doi:10.1001/jamanetworkopen.2019.4392), 2019-05-24
Supplement: jamanetwopen-2-e194392-s001.pdf [file jamanetwopen-2-e194392-s001.pdf]

## Supplementary Online Content

Lin YL, Trbovich P, Kolodzey L, Nickel C, Guerguerian A-M. Association of data integration technologies with intensive care clinician performance: a systematic review and meta-analysis. *JAMA Netw Open*. 2019;2(5):e194392.  
doi:10.1001/jamanetworkopen.2019.4392

**eMethods 1.** MEDLINE Example: Search Strategy Conducted in May 2014

**eMethods 2.** Web of Science Example: Search Strategy Conducted in January 2018

**eTable 1.** Characteristics of the Studies, Technology, Study Completeness Score, and QUASII Score

**eTable 2.** Study Design Type, Scenario Descriptions, Tasks, Technology Maturity, Comparators, and Temporal Representations

**eTable 3.** Modified Study Completeness Assessment Tool for Quantitative Human Factors Studies

**eTable 4.** Human Factors Study Quality Assessment Tool, a Modified Version of the Quality Assessment Informatics Instrument (QUASII)

**eReferences**

This supplementary material has been provided by the authors to give readers additional information about their work.

## eMethods 1. Medline Example: Search Strategy Conducted in May 2014

### Databases: Medline, Embase, Web of Science, PsycINFO

1 exp Critical Care/ (43531)  
2 exp Intensive Care Units/ (55611)  
3 ((critical or intensive) adj2 care).mp. (130846)  
4 (PICU or NICU or ICU).mp. (32491)  
5 ((patient\* or ambulator\* or "body temperature\*" or electrocardiograph\* or ekg or ecg or "electric cardiogram\*" or electrocardiogram\* or brain\* or cerebral\*) adj2 monitor\*).mp. (39649)  
6 ("life support\*" or CPR or resuscitat\* or reanimat\* or capnogra\* or capnometry or neuromonitor\* or telemonitor\*).mp. (72347)  
7 ((airway\* or breath\*) adj2 (control\* or manage\* or regulat\*)).mp. (9010)  
8 (high adj2 frequenc\* adj2 ventilat\*).mp. (3582)  
9 ((invasive or noninvasive or "non invasive") adj2 ventilat\*).mp. (3469)  
10 (pressure\* adj2 (breath\* or respirat\* or ventilat\*)).mp. (23265)  
11 (respirat\* adj2 (control\* or regulat\*)).mp. (6807)  
12 (therapeutic\* adj2 hyperventilat\*).mp. (10)  
13 (ventilat\* adj2 support).mp. (5872)

14 or/1-13 (280140)

15 (data\* adj2 display\*).mp. (7541)  
16 (physiologic\* adj2 monitor\*).mp. (45714)  
17 (graph\* adj2 display\*).mp. (1509)  
18 (data\* adj2 interface\*).mp. (586)  
19 (monitor\* adj2 (system\* or platform\*)).mp. (12029)  
20 (software\* adj2 (system\* or platform\*)).mp. (2698)  
21 ((multimodal\* or multi-modal\*) adj2 monitor\*).mp. (259)  
22 (continuous adj2 monitor\*).mp. (9941)  
23 (computer\* adj2 (design\* or graphic\*)).mp. (25269)  
24 (software\* adj2 design\*).mp. (6419)  
25 informatic\*.mp. (17315)  
26 (data\* adj2 acquisition\*).mp. (8040)  
27 (integrat\* adj2 (display\* or monitor\* or platform\* or software\*)).mp. (1802)

28 or/15-27 (129019)

29 evaluation studies as topic/ or device approval/ or diagnostic test approval/ or feasibility studies/ or pilot projects/ or program evaluation/ or validation studies as topic/ (284249)  
30 decision support techniques/ or data interpretation, statistical/ (60230)  
31 Decision Support Systems, Clinical/ (4743)  
32 Technology Assessment, Biomedical/ (8069)  
33 "outcome assessment (health care)"/ or patient outcome assessment/ or watchful waiting/ or "process assessment (health care)"/ (52518)  
34 quality assurance, health care/ or total quality management/ or quality improvement/ (64251)  
35 user-computer interface/ (27480)  
36 Adaptation, Psychological/ (73905)  
37 human engineering/ or man-machine systems/ or "task performance and analysis"/ or "time and motion studies"/ or work simplification/ (36767)  
38 Consumer Satisfaction/ (17443)  
39 human factor\*.mp. (4523)  
40 (adapt\* or adjust\* or analys\* or assess\* or "clinical prediction\*" or coping or "critical incident techni\*" or critique\* or "decision aid\*" or "decision\* model\*" or "decision\* support model\*" or "decision\* support system\*" or "decision\* support techni\*" or "device approv\*" or "diagnostic test\* approv\*" or effective\* or ergonomic\* or

evaluat\* or "feasibility stud\*" or "human engineer\*" or interpret\* or "man-machine system\*" or outcome\* or "pilot project\*" or "pilot stud\*" or preference\* or "pre-post test\*" or "process\* measure\*" or "program\* sustainab\*" or "psychology engineer\*" or "quality assurance" or "quality improve\*" or "quality manage\*" or satisf\* or "task\* performance\*" or "technology assess\*" or "time and motion stud\*" or "time stud\*" or "user-computer interface\*" or "validation stud\*" or "virtual system\*" or "watchful wait\*" or "work simplif\*").mp. (7676889)

41 or/29-40 (7678638)

42 14 and 28 and 41 (10389)

43 limit 42 to yr="2000 -Current" (6209)

## eMethods 2. Web of Science Example: Search Strategy Conducted in January 2018

Databases: Medline, Embase, Web of Science, PsycINFO.

| Set  | Results    |                                                                                                                                                                                                                                                                                                                                                                                                                                                                                                                                                                                                                                |
|------|------------|--------------------------------------------------------------------------------------------------------------------------------------------------------------------------------------------------------------------------------------------------------------------------------------------------------------------------------------------------------------------------------------------------------------------------------------------------------------------------------------------------------------------------------------------------------------------------------------------------------------------------------|
| # 38 | 1,794      | (#35 OR #28) AND LANGUAGE: (English)<br>Indexes=SCI-EXPANDED, SSCI, CPCI-S, CPCI-SSH Timespan=2014-2018                                                                                                                                                                                                                                                                                                                                                                                                                                                                                                                        |
| # 37 | 5,283      | (#35 OR #28) AND LANGUAGE: (English)<br>Indexes=SCI-EXPANDED, SSCI, CPCI-S, CPCI-SSH Timespan=All years                                                                                                                                                                                                                                                                                                                                                                                                                                                                                                                        |
| # 36 | 5,495      | #35 OR #28<br>Indexes=SCI-EXPANDED, SSCI, CPCI-S, CPCI-SSH Timespan=All years                                                                                                                                                                                                                                                                                                                                                                                                                                                                                                                                                  |
| # 35 | 171        | #34 AND #7<br>Indexes=SCI-EXPANDED, SSCI, CPCI-S, CPCI-SSH Timespan=All years                                                                                                                                                                                                                                                                                                                                                                                                                                                                                                                                                  |
| # 34 | 29,939     | #33 OR #32 OR #31 OR #30 OR #29<br>Indexes=SCI-EXPANDED, SSCI, CPCI-S, CPCI-SSH Timespan=All years                                                                                                                                                                                                                                                                                                                                                                                                                                                                                                                             |
| # 33 | 14,704     | TS=(human* NEAR/2 computer* NEAR/2 (interface* or interact*))<br>Indexes=SCI-EXPANDED, SSCI, CPCI-S, CPCI-SSH Timespan=All years                                                                                                                                                                                                                                                                                                                                                                                                                                                                                               |
| # 32 | 737        | TS="man-machine system*"<br>Indexes=SCI-EXPANDED, SSCI, CPCI-S, CPCI-SSH Timespan=All years                                                                                                                                                                                                                                                                                                                                                                                                                                                                                                                                    |
| # 31 | 12,259     | TS=(graph* NEAR/1 user* NEAR/1 interface*)<br>Indexes=SCI-EXPANDED, SSCI, CPCI-S, CPCI-SSH Timespan=All years                                                                                                                                                                                                                                                                                                                                                                                                                                                                                                                  |
| # 30 | 2,300      | TS=(ecological NEAR/2 (display* or interface* or monitor*))<br>Indexes=SCI-EXPANDED, SSCI, CPCI-S, CPCI-SSH Timespan=All years                                                                                                                                                                                                                                                                                                                                                                                                                                                                                                 |
| # 29 | 333        | TS="user-computer interface*"<br>Indexes=SCI-EXPANDED, SSCI, CPCI-S, CPCI-SSH Timespan=All years                                                                                                                                                                                                                                                                                                                                                                                                                                                                                                                               |
| # 28 | 5,395      | #27 AND #23 AND #7<br>Indexes=SCI-EXPANDED, SSCI, CPCI-S, CPCI-SSH Timespan=All years                                                                                                                                                                                                                                                                                                                                                                                                                                                                                                                                          |
| # 27 | 18,330,350 | #26 OR #25 OR #24<br>Indexes=SCI-EXPANDED, SSCI, CPCI-S, CPCI-SSH Timespan=All years                                                                                                                                                                                                                                                                                                                                                                                                                                                                                                                                           |
| # 26 | 2,601,342  | TS=simulat*<br>Indexes=SCI-EXPANDED, SSCI, CPCI-S, CPCI-SSH Timespan=All years                                                                                                                                                                                                                                                                                                                                                                                                                                                                                                                                                 |
| # 25 | 16,751,072 | TS=(adapt* or adjust* or analys* or assess* or "clinical prediction*" or "critical incident techni*" or critique* or "decision aid*" or "decision* model*" or "decision* support model*" or "decision* support system*" or "decision* support techni*" or effective* or ergonomic* or evaluat* or "human engineer*" or interpret* or outcome* or preference* or "process* measure*" or "psychology engineer*" or satisf* or "task* performance*" or "technology assess*" or "time and motion stud*" or "time stud*" or "watchful wait*" or "work simplif*")<br>Indexes=SCI-EXPANDED, SSCI, CPCI-S, CPCI-SSH Timespan=All years |
| # 24 | 662,501    | TS=human factor*<br>Indexes=SCI-EXPANDED, SSCI, CPCI-S, CPCI-SSH Timespan=All years                                                                                                                                                                                                                                                                                                                                                                                                                                                                                                                                            |
| # 23 | 406,575    | #22 OR #21 OR #20 OR #19 OR #18 OR #17 OR #16 OR #15 OR #14 OR #13 OR #12 OR #11 OR #10 OR #9 OR #8<br>Indexes=SCI-EXPANDED, SSCI, CPCI-S, CPCI-SSH Timespan=All years                                                                                                                                                                                                                                                                                                                                                                                                                                                         |
| # 22 | 83,732     | TS=(information NEAR/2 technolog*)<br>Indexes=SCI-EXPANDED, SSCI, CPCI-S, CPCI-SSH Timespan=All years                                                                                                                                                                                                                                                                                                                                                                                                                                                                                                                          |
| # 21 | 15,777     | TS=((data* or information*) NEAR/2 visualization)<br>Indexes=SCI-EXPANDED, SSCI, CPCI-S, CPCI-SSH Timespan=All years                                                                                                                                                                                                                                                                                                                                                                                                                                                                                                           |
| # 20 | 21,211     | TS=(integrat* NEAR/2 (display* or monitor* or platform* or software*))<br>Indexes=SCI-EXPANDED, SSCI, CPCI-S, CPCI-SSH Timespan=All years                                                                                                                                                                                                                                                                                                                                                                                                                                                                                      |
| # 19 | 54,416     | TS=(data* NEAR/2 acquisition*)<br>Indexes=SCI-EXPANDED, SSCI, CPCI-S, CPCI-SSH Timespan=All years                                                                                                                                                                                                                                                                                                                                                                                                                                                                                                                              |
| # 18 | 20,236     | TS=informatic*                                                                                                                                                                                                                                                                                                                                                                                                                                                                                                                                                                                                                 |

|      |         |                                                                                                                              |
|------|---------|------------------------------------------------------------------------------------------------------------------------------|
|      |         | Indexes=SCI-EXPANDED, SSCI, CPCI-S, CPCI-SSH Timespan=All years                                                              |
| # 17 | 27,330  | TS=(software* NEAR/2 design*)<br>Indexes=SCI-EXPANDED, SSCI, CPCI-S, CPCI-SSH Timespan=All years                             |
| # 16 | 43,047  | TS=(computer* NEAR/2 (design* or graphic*))<br>Indexes=SCI-EXPANDED, SSCI, CPCI-S, CPCI-SSH Timespan=All years               |
| # 15 | 25,505  | TS=(continuous NEAR/2 monitor*)<br>Indexes=SCI-EXPANDED, SSCI, CPCI-S, CPCI-SSH Timespan=All years                           |
| # 14 | 606     | TS=((multimodal* or multi-modal*) NEAR/2 monitor*)<br>Indexes=SCI-EXPANDED, SSCI, CPCI-S, CPCI-SSH Timespan=All years        |
| # 13 | 48,254  | TS=(software* NEAR/2 (system* or platform*))<br>Indexes=SCI-EXPANDED, SSCI, CPCI-S, CPCI-SSH Timespan=All years              |
| # 12 | 76,107  | TS=(monitor* NEAR/2 (system* or platform*))<br>Indexes=SCI-EXPANDED, SSCI, CPCI-S, CPCI-SSH Timespan=All years               |
| # 11 | 7,252   | TS=(data* NEAR/2 interface*)<br>Indexes=SCI-EXPANDED, SSCI, CPCI-S, CPCI-SSH Timespan=All years                              |
| # 10 | 6,151   | TS=(graph* NEAR/2 display*)<br>Indexes=SCI-EXPANDED, SSCI, CPCI-S, CPCI-SSH Timespan=All years                               |
| # 9  | 3,764   | TS=(physiologic* NEAR/2 monitor*)<br>Indexes=SCI-EXPANDED, SSCI, CPCI-S, CPCI-SSH Timespan=All years                         |
| # 8  | 7,941   | TS=(data* NEAR/2 display*)<br>Indexes=SCI-EXPANDED, SSCI, CPCI-S, CPCI-SSH Timespan=All years                                |
| # 7  | 209,300 | #6 OR #5 OR #4 OR #3 OR #2 OR #1<br>Indexes=SCI-EXPANDED, SSCI, CPCI-S, CPCI-SSH Timespan=All years                          |
| # 6  | 1,749   | TS=(med* NEAR/2 surg* NEAR/2 unit*)<br>Indexes=SCI-EXPANDED, SSCI, CPCI-S, CPCI-SSH Timespan=All years                       |
| # 5  | 16,384  | TS=(pressure* NEAR/2 (breath* or respirat* or ventilat*))<br>Indexes=SCI-EXPANDED, SSCI, CPCI-S, CPCI-SSH Timespan=All years |
| # 4  | 1,384   | TS=neuromonitor*<br>Indexes=SCI-EXPANDED, SSCI, CPCI-S, CPCI-SSH Timespan=All years                                          |
| # 3  | 36,275  | TS=((patient* or brain* or cerebral*) NEAR/2 monitor*)<br>Indexes=SCI-EXPANDED, SSCI, CPCI-S, CPCI-SSH Timespan=All years    |
| # 2  | 51,821  | TS=(PICU or NICU or ICU)<br>Indexes=SCI-EXPANDED, SSCI, CPCI-S, CPCI-SSH Timespan=All years                                  |
| # 1  | 143,145 | TS=((critical or intensive) NEAR/2 care)<br>Indexes=SCI-EXPANDED, SSCI, CPCI-S, CPCI-SSH Timespan=All years                  |

**eTable 1. Characteristics of the Studies, Technology, Study Completeness Score and QUASII Score**

**Study completeness score, max 47; QUASII score, max 90. Studies ordered alphabetically by last name of the first author and year of publication.**

| Study | Last name (year) | Country/Setting                                            | Sample                                         | Technology                                                                                                   | Study Design/Methods/Measures                                                                                                                                                                                                                   | Key Findings                                                                                                       | Completeness Score | QUASII Score |
|-------|------------------|------------------------------------------------------------|------------------------------------------------|--------------------------------------------------------------------------------------------------------------|-------------------------------------------------------------------------------------------------------------------------------------------------------------------------------------------------------------------------------------------------|--------------------------------------------------------------------------------------------------------------------|--------------------|--------------|
| 1     | Ahmed (2011)     | USA, ICU in an academic tertiary referral center           | Six attending physicians, 14 residents/fellows | Novel user interface electronic environment<br>Task: specific user interfaces<br>EMR: user interface showing | Design: Prospective, unblinded randomized crossover study<br>Methods: Low-fidelity simulation<br>Measures: Cognitive workload (NASA-TLX), number of errors in cognition, time to task completion (in seconds), total quantity of data presented | Cognitive workload, error rates, and time efficiency improved while data points were reduced with novel technology | 38                 | 78           |
| 2     | Anders (2012)    | USA, two university teaching hospital intensive care units | 32 ICU nurses, 16 per site                     | Integrated graphical information display                                                                     | Design: Repeated measures simulations study<br>Methods: Low-fidelity simulation<br>Measures: Percent correct detection of abnormal patient variables, nurse task load (NASA-TLX), display usability rating                                      | Clinicians were able to better detect errors with the novel technology                                             | 35                 | 74           |

| Study | Last name (year) | Country/Setting                             | Sample                                                                                                             | Technology                                                                                                                                                        | Study Design/Methods/Measures                                                                                                                                                                            | Key Findings                                                                                       | Completeness Score | QUASII Score |
|-------|------------------|---------------------------------------------|--------------------------------------------------------------------------------------------------------------------|-------------------------------------------------------------------------------------------------------------------------------------------------------------------|----------------------------------------------------------------------------------------------------------------------------------------------------------------------------------------------------------|----------------------------------------------------------------------------------------------------|--------------------|--------------|
| 3     | Drews (2014)     | USA, applied and basic cognition laboratory | 42 ICU nurses                                                                                                      | Configural Vitals Signs (CVS) Display                                                                                                                             | Design: Between-subjects experimental design<br>Method: Low-fidelity simulation<br>Measures: Response time, accuracy of data interpretation, workload (NASA-TLX), clinical desirability of CVS display   | Data interpretation and accuracy improved with the novel technology                                | 37                 | 74           |
| 4     | Dziadzko (2016)  | USA, ICUs at two tertiary hospitals         | 246 respondents before (existing EMR) and 115 respondents after (existing EMR+ novel EMR interface) surveys        | AWARE (ambient warning and response evaluation), a novel internet based application extracts and organizes relevant patient data using ranking and decision rules | Design: Before and after implementation survey<br>Methods: Survey<br>Measures: User satisfaction and usability                                                                                           | Clinicians with prescribing duties preferred the novel technology                                  | 38                 | 72           |
| 5     | Effken (2006)    | USA, Arizona Health Sciences Center         | 20 novice ICU nurses, 13 medical residents with ICU rotation, three expert ICU nurses, three expert ICU physicians | Etiologic Potentials Display (EPD)                                                                                                                                | Design: Mixed design two (order) × two (display) × four (scenario) × three (level)<br>Methods: High-fidelity simulation with interactive simulator<br>Measures: Treatment initiation time, percentage of | Clinician performance did not improve with novel interface. Clinicians preferred data displayed as | 36                 | 70           |

| Study | Last name (year) | Country/Setting                | Sample                                                                                                           | Technology                                     | Study Design/Methods/Measures                                                                                                                                                      | Key Findings                                                                                                                                                                                                                                                                  | Completeness Score | QUASII Score |
|-------|------------------|--------------------------------|------------------------------------------------------------------------------------------------------------------|------------------------------------------------|------------------------------------------------------------------------------------------------------------------------------------------------------------------------------------|-------------------------------------------------------------------------------------------------------------------------------------------------------------------------------------------------------------------------------------------------------------------------------|--------------------|--------------|
|       |                  |                                |                                                                                                                  |                                                | time patient variables were kept within a target range                                                                                                                             | numerical values                                                                                                                                                                                                                                                              |                    |              |
| 6     | Effken (2008)    | USA, University of Arizona     | 32 adult ICU nurses                                                                                              | Ecological Display (ED) with variables ordered | Design: Mixed experimental design<br>Methods: Written pretests and simulation<br>Measures: Critical event recognition, treatment efficiency, cognitive workload, user satisfaction | If too many pictorial representations are used, efficient clinical decision-making may be impeded                                                                                                                                                                             | 40                 | 76           |
| 7     | Ellsworth (2014) | USA, neonatal ICU, Mayo Clinic | 23 NICU respondents: eight attending physicians, two fellows, four nurse practitioners, nine pediatric residents | 98 unique data items available from the EMR    | Design: Web-based survey<br>Methods: Web-based survey<br>Measures: Mean importance score for data items used in NICU routine clinical decision making                              | Top five data items: daily weight, pH, partial pressure of carbon dioxide (pCO <sub>2</sub> ), fraction of inspired oxygen (FiO <sub>2</sub> ) and blood culture results.<br>16 of the 98 items (16%) received an absolutely necessary rating by more than 50% of respondents | 38                 | 70           |



| Study | Last name (year) | Country/Setting                                                 | Sample                                                                   | Technology                                                                                                     | Study Design/Methods/Measures                                                                                                                                                                                                          | Key Findings                                                                          | Completeness Score | QUASII Score |
|-------|------------------|-----------------------------------------------------------------|--------------------------------------------------------------------------|----------------------------------------------------------------------------------------------------------------|----------------------------------------------------------------------------------------------------------------------------------------------------------------------------------------------------------------------------------------|---------------------------------------------------------------------------------------|--------------------|--------------|
| 8     | Forsman (2013)   | Sweden, ICUs of a university hospital and two general hospitals | 15 physicians (ethnographic study), eight physicians (usability testing) | Integrated information display for patient infection status to inform antibiotics use                          | Design: Ethnographic studies and participatory design<br>Methods: Observations, semi-structured interviews, focus group, usability testing with eye tracking<br>Measures: Time, System Usability Scale questionnaire                   | Physicians preferred novel technology compared to existing system, mean SUS was 79.5% | 36                 | 59           |
| 9     | Görges (2011)    | USA, University of Utah Health Sciences Center break room       | 16 medical ICU nurses                                                    | Two far-view physiological monitoring displays:<br>- strip-chart/bar display<br>- circular, clock-like display | Design: Repeated-measures within-subject experimental design<br>Method: Low-fidelity simulation, randomized repeated measures within-subject design<br>Measures: Decision time, decision accuracy, workload scores, display preference | Time, accuracy, cognitive workload improved with novel technology                     | 37                 | 76           |
| 10    | Görges (2012)    | USA University of Utah Health Sciences Center, break room       | 15 ICU fellow physicians                                                 | Two far-view physiological monitoring displays:<br>- strip-chart/bar display<br>- circular, clock-like display | Design: Randomized repeated measures within-subject design<br>Method: Low-fidelity simulation<br>Measures: Decision time, decision accuracy, workload scores, display preference                                                       | Time, accuracy and cognitive workload improved with novel technology                  | 34                 | 74           |
| 11    | Koch (2013)      | USA, nurses' break room, BTICU                                  | 12 experienced BTICU nurses                                              | Integrated information display with information used for                                                       | Design: Counter-balanced (on display order), repeated-measures design<br>Method: Simulations requiring participants identify                                                                                                           | Situation awareness improved with novel technology                                    | 43                 | 74           |

| Study | Last name (year) | Country/Setting                                             | Sample                                                                          | Technology                                                                 | Study Design/Methods/Measures                                                                                                                                                                                                                                                                                                                                                                                                  | Key Findings                                                                                                               | Completeness Score | QUASII Score |
|-------|------------------|-------------------------------------------------------------|---------------------------------------------------------------------------------|----------------------------------------------------------------------------|--------------------------------------------------------------------------------------------------------------------------------------------------------------------------------------------------------------------------------------------------------------------------------------------------------------------------------------------------------------------------------------------------------------------------------|----------------------------------------------------------------------------------------------------------------------------|--------------------|--------------|
|       |                  |                                                             |                                                                                 | comparable tasks was shown in spatial proximity                            | information about medication management, patient awareness, and team communication<br>Measures: Situation awareness (accuracy of the participants' answer) and task completion time                                                                                                                                                                                                                                            |                                                                                                                            |                    |              |
| 12    | Law (2005)       | UK, Neonatal ICU                                            | 32 nurses and 16 physicians                                                     | Displays presented in a research version of Badger trend monitoring system | Design: Mixed design<br>Method: Simulations requiring participants perform eight types of actions: order chest X-ray, intubate or re-intubate, re-apply transcutaneous probe, start dopamine, treat with surfactant, put patient on high-frequency oscillatory ventilation, start continuous positive airway pressure, or no action<br>Measures: Speed of responses, quality/appropriateness of responses, reported preference | Clinicians selected more appropriate actions when data presented in text form versus graph but time efficiency was similar | 33                 | 73           |
| 13    | Liu (2004)       | Sweden, ICU of university hospital and usability laboratory | Interviews: Six ICU nurses<br>Usability testing: In 20 medical nursing students | Graphical circular display prototype of a ventilator machine display       | Design: Within subject design<br>Method: Interviews and usability testing<br>Measures: Detection time and error rates                                                                                                                                                                                                                                                                                                          | Detection time and error rates did not improve significantly with novel technology                                         | 32                 | 70           |

| Study | Last name (year) | Country/Setting                                                       | Sample                                           | Technology                                                                                           | Study Design/Methods/Measures                                                                                                                                                                                                                                                                                                 | Key Findings                                                                                              | Completeness Score | QUASII Score |
|-------|------------------|-----------------------------------------------------------------------|--------------------------------------------------|------------------------------------------------------------------------------------------------------|-------------------------------------------------------------------------------------------------------------------------------------------------------------------------------------------------------------------------------------------------------------------------------------------------------------------------------|-----------------------------------------------------------------------------------------------------------|--------------------|--------------|
| 14    | Miller (2009)    | Australia, ICUs of two major metropolitan tertiary teaching hospitals | 16 nurses and 12 physicians                      | Work Domain Analysis-based Paper Prototype and Electronic Prototype of a clinical information system | Design: Within-participants, two (control and prototype) x four (patient data sets) counterbalanced design<br>Methods: Simulated scenarios where nurses detected changes in patient parameters and physicians completed diagnostic tasks<br>Measures: Detection of patient change (nurses) and physician diagnostic agreement | Detection of patient change (nurses) and diagnostic agreement (physicians) improved with novel technology | 35                 | 66           |
| 15    | Peute (2011)     | The Netherlands, clinical workspace                                   | 12 participants (unspecified specialty)          | Web-based data query tool of the Dutch National ICE                                                  | Design: Pre-post design, think-aloud usability study<br>Method: Usability testing<br>Measures: Number of usability issues and task efficiency                                                                                                                                                                                 | Task completion and efficiency improved after technology interface redesign                               | 34                 | 46           |
| 16    | Pickering (2010) | USA, remote testing facility                                          | Six off-duty critical care fellows and residents | AWARE program which extracts a subset of predefined cues based on relevance                          | Design: Prospective, randomized, crossover pilot study<br>Methods: Simulated scenarios to extract a sequence of decision making cues<br>Measures: Cognitive workload (NASA TLX), number of medical error and efficiency (time and accuracy)                                                                                   | Novel technology reduced time to task completion, provider cognitive workload and medical error           | 33                 | 76           |

| Study | Last name (year)      | Country/Setting  | Sample                                                                                              | Technology                                                                                                                                            | Study Design/Methods/Measures                                                                                                                                                                                                                        | Key Findings                                                                                                                                                             | Completeness Score | QUASII Score |
|-------|-----------------------|------------------|-----------------------------------------------------------------------------------------------------|-------------------------------------------------------------------------------------------------------------------------------------------------------|------------------------------------------------------------------------------------------------------------------------------------------------------------------------------------------------------------------------------------------------------|--------------------------------------------------------------------------------------------------------------------------------------------------------------------------|--------------------|--------------|
| 17    | Pickering (2013)      | USA, three ICUs  | 1,277 physician-patient interactions and 925 respondents                                            | Institutional EMR system integrating vital signs, microbiology, medications, laboratory results, fluids, nursing flow sheet items, and clinical notes | Design: Prospective observational study and retrospective chart review<br>Methods: Observations and questionnaires<br>Measures: Frequency of data elements used per physician-patient interaction episode.                                           | Over 25% of the information contained in the EMR was never used for diagnosis and treatment. Monitoring and lab data was most valuable                                   | 39                 | 79           |
| 18    | Pickering (2015)      | USA, four ICUs   | 375 clinicians (physicians, nurses, respiratory therapists and pharmacists), 169 survey respondents | AWARE program deployed in the ICUs compared to EMR system                                                                                             | Design: Step wedge cluster randomized control trial<br>Methods: Direct observations and surveys<br>Measures: Time to gather information                                                                                                              | Time spent on pre-round data gathering per patient decreased with novel technology                                                                                       | 41                 | 79           |
| 19    | van der Meulen (2010) | UK, Neonatal ICU | 18 physicians and 17 nurses                                                                         | Natural Language Generation using BT-45 computer program, summarizing physiological data                                                              | Design: Mixed experimental design<br>Methods: Simulations where participants must select appropriate actions<br>Measures: Response time and scores through expert consensus whether clinicians' actions were appropriate, inappropriate, and neutral | Human generated descriptions were better able to support medical decision-making than graphs with trend lines. Computer text condition was comparable to graph condition | 30                 | 64           |

| Study | Last name (year) | Country/ Setting                              | Sample                                                                                                                   | Technology                                                                                                                                                                                                                | Study Design/Methods/Measures                                                                                                                                                                    | Key Findings                                                                                                             | Completeness Score | QUASII Score |
|-------|------------------|-----------------------------------------------|--------------------------------------------------------------------------------------------------------------------------|---------------------------------------------------------------------------------------------------------------------------------------------------------------------------------------------------------------------------|--------------------------------------------------------------------------------------------------------------------------------------------------------------------------------------------------|--------------------------------------------------------------------------------------------------------------------------|--------------------|--------------|
| 20    | Wachter (2005)   | USA, Medical ICU, University of Utah Hospital | 32 clinicians (physicians, residents, nurses, and respiratory therapists) attending to two ventilator-dependent patients | Pulmonary function graphical and numerical display with fraction inspired oxygen (FiO <sub>2</sub> ), end tidal carbon dioxide, tidal volume, and anatomical representation of intrinsic positive end expiratory pressure | Design: Observational study design<br>Methods: Observations and questionnaires<br>Measures: Number of glances at display, perceived usefulness, acceptance, desirability and accuracy of display | Nurses, respiratory therapists, and physicians looked at the novel technology, on average 1.31, 3 and 6, times per visit | 27                 | 50           |

Abbreviations: AWARE, ambient warning and response evaluation; Badger; BTICU, burn trauma intensive care unit; CVS, configurable vital signs; ED, ecological display; EMR, electronic medical record; EP, electronic prototype; EPD, etiologic potentials display; ICU, intensive care unit; NASA TLX, National Aeronautics and Space Administration Task Load Index; NLG, Natural Language Generation; PP, paper prototype; QUASII, QUality ASessment Informatics Instrument; SUS, system usability scale; USA, United States of America; WDA, work domain analysis.

**eTable 2. Study Design Type, Scenario Descriptions, Tasks, Technology Maturity, Comparators, and Temporal Representations**

Each column indicates a study ordered alphabetically by last name of the first author and year of publication. The number ‘1’ in a cell indicates the information was reported in the study’s manuscript. In Total column, we provide the sum of studies with the feature in the corresponding row.

| Study                                        | Last name first author (year) |               |              |                 |               |               |                  |                |               |               |             |            |            |               |              |                  |                  |                  |                       |                |       |
|----------------------------------------------|-------------------------------|---------------|--------------|-----------------|---------------|---------------|------------------|----------------|---------------|---------------|-------------|------------|------------|---------------|--------------|------------------|------------------|------------------|-----------------------|----------------|-------|
| Number                                       | 1                             | 2             | 3            | 4               | 5             | 6             | 7                | 8              | 9             | 10            | 11          | 12         | 13         | 14            | 15           | 16               | 17               | 18               | 19                    | 20             |       |
|                                              | Ahmed (2011)                  | Anders (2012) | Drews (2014) | Dziadzko (2016) | Effken (2006) | Effken (2008) | Ellsworth (2014) | Forsman (2013) | Görges (2011) | Görges (2012) | Koch (2013) | Law (2005) | Liu (2004) | Miller (2009) | Peute (2011) | Pickering (2010) | Pickering (2013) | Pickering (2015) | van der Meulen (2010) | Wachter (2005) | Total |
| <b>Design</b>                                |                               |               |              |                 |               |               |                  |                |               |               |             |            |            |               |              |                  |                  |                  |                       |                |       |
| Simulation                                   | 1                             | 1             | 1            |                 | 1             | 1             |                  | 1              | 1             | 1             | 1           | 1          | 1          | 1             | 1            |                  |                  |                  |                       |                | 14    |
| In-situ/direct observations                  |                               |               |              |                 |               |               |                  |                |               |               |             |            |            |               |              | 1                |                  | 1                |                       | 1              | 3     |
| Questionnaire/survey                         |                               |               |              | 1               |               |               | 1                |                |               |               |             |            |            |               |              |                  | 1                |                  |                       |                | 3     |
| Study assessment of realism                  |                               |               | 1            |                 |               |               |                  |                |               |               | 1           |            |            |               |              |                  |                  |                  |                       |                | 2     |
| <b>Scenario descriptions (when reported)</b> |                               |               |              |                 |               |               |                  |                |               |               |             |            |            |               |              |                  |                  |                  |                       |                |       |
| Sepsis/septic shock                          |                               | 1             | 1            |                 | 1             | 1             |                  |                |               |               |             |            |            | 1             |              |                  |                  |                  |                       |                | 5     |
| Pulmonary embolus/edema                      |                               |               | 1            |                 |               |               |                  |                |               |               |             |            |            | 1             |              |                  |                  |                  |                       |                | 2     |
| Stable patient                               |                               |               | 1            |                 |               |               |                  |                |               |               |             |            |            |               |              |                  |                  |                  |                       |                | 1     |
| Actively bleeding                            | 1                             |               |              |                 |               |               |                  |                |               |               |             |            |            |               |              |                  |                  |                  |                       |                | 1     |
| Post-operation                               |                               |               |              |                 | 1             | 1             |                  |                |               |               |             |            |            | 1             |              |                  |                  |                  |                       |                | 3     |
| Acute resp. distress syndrome                |                               |               |              |                 | 1             |               |                  |                |               |               |             |            |            | 1             |              |                  |                  |                  |                       |                | 2     |
| Abnormal cardiac rhythm                      |                               |               |              |                 | 1             | 1             |                  |                |               |               |             |            |            |               |              |                  |                  |                  |                       |                | 2     |
| Tamponade                                    |                               |               |              |                 | 1             |               |                  |                |               |               |             |            |            |               |              |                  |                  |                  |                       |                | 1     |

| Study                                     | Last name first author (year) |               |              |                 |               |               |                  |                |               |               |             |              |            |               |              |                  |                  |                  |                       |                |       |   |
|-------------------------------------------|-------------------------------|---------------|--------------|-----------------|---------------|---------------|------------------|----------------|---------------|---------------|-------------|--------------|------------|---------------|--------------|------------------|------------------|------------------|-----------------------|----------------|-------|---|
| Number                                    | 1                             | 2             | 3            | 4               | 5             | 6             | 7                | 8              | 9             | 10            | 11          | 12           | 13         | 14            | 15           | 16               | 17               | 18               | 19                    | 20             |       |   |
|                                           | Ahmed (2011)                  | Anders (2012) | Drews (2014) | Dziadzko (2016) | Effken (2006) | Effken (2008) | Ellsworth (2014) | Forsman (2013) | Görges (2011) | Görges (2012) | Koch (2013) | Law (2005)   | Liu (2004) | Miller (2009) | Peute (2011) | Pickering (2010) | Pickering (2013) | Pickering (2015) | van der Meulen (2010) | Wachter (2005) | Total |   |
| <b>Tasks</b>                              |                               |               |              |                 |               |               |                  |                |               |               |             |              |            |               |              |                  |                  |                  |                       |                |       |   |
| Use of antibiotics                        |                               |               |              |                 |               |               |                  | 1              |               |               |             |              |            |               |              |                  |                  |                  |                       |                | 1     |   |
| Mechanical ventilation                    |                               |               |              |                 |               |               |                  |                |               |               |             |              | 1          |               |              |                  |                  |                  |                       |                | 1     | 2 |
| Database query                            |                               |               |              |                 |               |               |                  |                |               |               |             |              |            |               | 1            |                  |                  |                  |                       |                |       | 1 |
| Continuous infusions                      |                               |               |              |                 |               |               |                  |                | 1             | 1             | 1           |              |            |               |              |                  |                  |                  |                       |                |       | 3 |
| <b>Technology maturity</b>                |                               |               |              |                 |               |               |                  |                |               |               |             |              |            |               |              |                  |                  |                  |                       |                |       |   |
| Paper                                     |                               |               |              |                 |               |               |                  |                |               |               |             |              |            | 1             |              |                  |                  |                  |                       |                |       | 1 |
| Computer static                           |                               |               |              |                 |               |               |                  |                |               |               |             |              |            | 1             |              |                  |                  |                  |                       |                | 1     | 2 |
| Computer slide deck with some interaction |                               |               | 1            |                 | 1             |               |                  |                | 1             | 1             | 1           | 1            | 1          |               |              |                  |                  |                  | 1                     |                |       | 8 |
| Fully-interactive                         | 1                             | 1             |              |                 |               | 1             |                  | 1              |               |               |             |              |            |               |              | 1                | 1                | 1                | 1                     |                |       | 8 |
| <b>Comparator</b>                         |                               |               |              |                 |               |               |                  |                |               |               |             |              |            |               |              |                  |                  |                  |                       |                |       |   |
| Traditional data source                   | 1                             |               | 1            |                 |               |               |                  |                | 1             | 1             | 1           |              | 1          | 1             |              | 1                |                  | 1                |                       |                |       | 9 |
| Other display                             |                               |               |              |                 | 1             | 1             |                  |                |               |               |             |              |            |               |              |                  |                  |                  |                       |                |       | 2 |
| Other specialty                           |                               |               |              |                 |               |               |                  | 1              |               |               |             |              |            |               |              |                  |                  |                  |                       |                | 1     | 2 |
| <b>Temporal representation</b>            |                               |               |              |                 |               |               |                  |                |               |               |             |              |            |               |              |                  |                  |                  |                       |                |       |   |
| Current                                   | 1                             |               |              |                 | 1             | 1             |                  |                |               |               | 1           |              | 1          |               |              | 1                | 1                | 1                |                       |                | 1     | 9 |
| Historical (explicit)                     |                               |               |              |                 |               |               |                  | ICU stay       | 12h           | 12h           |             | 30min, 53min |            | 5 days        |              |                  | 3h               |                  | 45min                 |                |       | 7 |
| Historical (implicit)                     |                               | 1             | 1            |                 |               |               |                  |                |               |               | 1           |              |            |               |              |                  |                  |                  |                       |                |       | 3 |

### eTable 3. Modified Study Completeness Assessment Tool for Quantitative Human Factors Studies

The original study completeness checklist published by Peute et al. consisted of 51 items.<sup>1</sup> The practical application of the checklist resulted in the removal of six items (items strike through 13, 30, 33, 43, 44 and 45) and the addition of two items (marked as new in the item # column). The maximum completeness score is 47 with one point for each element.

| Heading                | Sub-Heading                                                                                         | Item #        | Item description                                                                                                               |
|------------------------|-----------------------------------------------------------------------------------------------------|---------------|--------------------------------------------------------------------------------------------------------------------------------|
| Introduction           | Keywords                                                                                            | 1             | Type or functionality of the system                                                                                            |
|                        |                                                                                                     | 2             | User-Centered Design phases                                                                                                    |
|                        |                                                                                                     | 3             | Methods applied                                                                                                                |
|                        |                                                                                                     | 4             | Usability as mesh term                                                                                                         |
|                        | Essential Information                                                                               | 5             | Conclusion or recommendations previous Human Factors/usability studies                                                         |
|                        |                                                                                                     | 6             | Purpose and reason for study                                                                                                   |
|                        |                                                                                                     | 7             | Scientific aims                                                                                                                |
| Background information | If Human Factors/usability study is an integrated part in Health Information Technology development | 8             | User-Centered Design phases that are covered                                                                                   |
|                        |                                                                                                     | 9             | System design principles or existing standards used specifications/goals/requirements depending on User-Centered Design phases |
|                        | If the study is scientifically oriented                                                             | 10            | User interface design principles applied or methods evaluated                                                                  |
|                        |                                                                                                     | 11            | Theories underlying the interface design principles or methods evaluated                                                       |
|                        | System type or its part/functionality                                                               | 12            | Version                                                                                                                        |
|                        |                                                                                                     | <del>13</del> | <del>Release date (removed)</del>                                                                                              |
|                        |                                                                                                     | 14            | Graphical view                                                                                                                 |
|                        |                                                                                                     | 15            | The setting                                                                                                                    |
|                        |                                                                                                     | 16            | The user tasks to be supported                                                                                                 |
|                        |                                                                                                     | 17            | Overview actual/intended users' profile                                                                                        |
|                        |                                                                                                     | 18            | If the system is in use the context of the system                                                                              |
|                        |                                                                                                     | 19            | User characteristics                                                                                                           |
| 20                     | Organizational and physical environment and equipment                                               |               |                                                                                                                                |
| Method                 | Methods section                                                                                     | 21            | Applied method(s)                                                                                                              |
|                        |                                                                                                     | 22            | Suitability of each method                                                                                                     |
|                        |                                                                                                     | 23            | Number of and expertise background of study evaluators                                                                         |
|                        |                                                                                                     | 24            | Description of study variables                                                                                                 |
|                        |                                                                                                     | 25            | Outcome measures and quality metrics                                                                                           |
|                        |                                                                                                     | 26            | If study used test scenarios or tasks                                                                                          |
|                        |                                                                                                     | new           | If scenarios developed based on Delphi or expert consensus                                                                     |
|                        |                                                                                                     | 27            | If study participants are (representative) end users                                                                           |



|            |                                                   |                                                                                            |                                                                                   |
|------------|---------------------------------------------------|--------------------------------------------------------------------------------------------|-----------------------------------------------------------------------------------|
|            |                                                   | new                                                                                        | Institutional Research Board or Research Ethics Board approval                    |
|            | Background study participants                     | 28                                                                                         | Age                                                                               |
|            |                                                   | 29                                                                                         | Gender                                                                            |
|            |                                                   | 30                                                                                         | <del>Linguistic and culture background (removed)</del>                            |
|            |                                                   | 31                                                                                         | Level of education                                                                |
|            |                                                   | 32                                                                                         | Professional competence                                                           |
|            |                                                   | 33                                                                                         | <del>potential disabilities (removed)</del>                                       |
|            |                                                   | 34                                                                                         | Level of experience using Information Technology                                  |
|            |                                                   | 35                                                                                         | Level of experience with similar system                                           |
|            | Generalizability and reproducibility of the study | 36                                                                                         | Setting of the study                                                              |
|            |                                                   | 37                                                                                         | Study period and evaluation time                                                  |
|            |                                                   | 38                                                                                         | Instructions provided to participants and the recruitment                         |
| Results    | Result section                                    | 39                                                                                         | If Human Factors/usability methods have been applied                              |
|            |                                                   | 40                                                                                         | Results are reported on per method                                                |
|            |                                                   | 41                                                                                         | Unexpected events encountered                                                     |
|            |                                                   | 42                                                                                         | Unexpected results uncovered                                                      |
|            | If the study reports on usability problems        | 43                                                                                         | <del>Presentation of results should rely on classification scheme (removed)</del> |
|            |                                                   | 44                                                                                         | <del>usability problems rated for their severity (removed)</del>                  |
| 45         |                                                   | <del>usability problems rated for their potential impact on patient safety (removed)</del> |                                                                                   |
| Discussion |                                                   | 46                                                                                         | Intended purpose of the study is achieved                                         |
|            |                                                   | 47                                                                                         | Limitations of the study                                                          |
|            |                                                   | 48                                                                                         | Contribution of the study to the User-Centered Design process                     |
|            |                                                   | 49                                                                                         | Added value of method applied                                                     |
|            |                                                   | 50                                                                                         | Knowledge/evidence gained in terms of Human Factors/usability principles          |
|            |                                                   | 51                                                                                         | Added value of this paper                                                         |

**eTable 4. Human Factors Study Quality Assessment Tool, a Modified Version of the Quality Assessment Informatics Instrument (QUASII)**

The QUASII assessment tool, originally developed by Weir et al. (2009),<sup>2</sup> consists of 18 questions, each with a possible score between 1 to 5, and resulting in a maximum study quality score of 90. The modifications to the questions (for use for technology and clinicians), and anchor statements are underlined.

| Questions                                                                                                                                                    | Anchor Definition                                                                                        |                                                                                            |                                                                     |                                                                                      |                                                                                | Further clarification                                                                                                                                                                                          |
|--------------------------------------------------------------------------------------------------------------------------------------------------------------|----------------------------------------------------------------------------------------------------------|--------------------------------------------------------------------------------------------|---------------------------------------------------------------------|--------------------------------------------------------------------------------------|--------------------------------------------------------------------------------|----------------------------------------------------------------------------------------------------------------------------------------------------------------------------------------------------------------|
|                                                                                                                                                              | Min (1)                                                                                                  | Mid-low (2)                                                                                | Mid (3)                                                             | Mid-high (4)                                                                         | Max (5)                                                                        |                                                                                                                                                                                                                |
| <b>SECTION ONE</b>                                                                                                                                           |                                                                                                          |                                                                                            |                                                                     |                                                                                      |                                                                                |                                                                                                                                                                                                                |
| 1. What is your estimate of the overall degree of research quality? (used for validation purposes)                                                           | Completely inadequate                                                                                    | Largely inadequate, significant issues                                                     | Somewhat adequate                                                   | Mostly adequate, few/minor issues                                                    | Completely adequate                                                            |                                                                                                                                                                                                                |
| 2. To what degree does the manipulation and/or measurement of the Independent Variable(s) reflect the underlying construct that was proposed by the authors? | Completely inadequate                                                                                    | Largely inadequate, significant issues                                                     | Somewhat adequate                                                   | Mostly adequate, few/minor issues                                                    | Completely adequate                                                            |                                                                                                                                                                                                                |
| 3. To what degree was the <u>technology implementation</u> sufficient?                                                                                       | Non-functional or significantly compromised implementation, e.g. paper prototype (Completely inadequate) | Low-fidelity simulation, unrepresentative setting (Largely inadequate, significant issues) | Low-fidelity simulation, representative setting (Somewhat adequate) | High-fidelity simulation, representative setting (Mostly adequate, few/minor issues) | Fully-realized technology, implementation <i>in situ</i> (Completely adequate) | Focusing on <i>realism</i> . <i>Fidelity</i> : Degree of the resemblance between experimental implementation (i.e. implementation in the study) and real-life implementation with respect to form and function |

| Questions                                                                                                                                                                                                                                                                                                                               | Anchor Definition                                                                                                                |                                               |                          |                                          |                                                                                                                    | Further clarification                                                                                                                                                                                                                                                                                                   |
|-----------------------------------------------------------------------------------------------------------------------------------------------------------------------------------------------------------------------------------------------------------------------------------------------------------------------------------------|----------------------------------------------------------------------------------------------------------------------------------|-----------------------------------------------|--------------------------|------------------------------------------|--------------------------------------------------------------------------------------------------------------------|-------------------------------------------------------------------------------------------------------------------------------------------------------------------------------------------------------------------------------------------------------------------------------------------------------------------------|
| <p>4. To what degree were the dependent variable(s) valid and clinically significant? (Is the selected dependent variable (DV) appropriate? Is the <u>impact of the technology</u> on the DV large enough to justify changing clinical practice? (To what degree were the dependent variable(s) valid and clinically significant? )</p> | <p>DV does not appropriately operationalize the construct of interest, is not clinically significant (Completely inadequate)</p> | <p>Largely inadequate, significant issues</p> | <p>Somewhat adequate</p> | <p>Mostly adequate, few/minor issues</p> | <p>DV appropriately operationalizes the construct of interest, is clinically significant (Completely adequate)</p> | <p><i>Clinical significance:</i><br/>Would a significant change in the dependent variable as a result of the treatment/intervention justify changing clinical practice?</p>                                                                                                                                             |
| <p>5. To what degree was the proposed relationship between the independent variable and the dependent variable specified in terms of mediators and moderators? Was there evidence of</p>                                                                                                                                                | <p>Completely inadequate</p>                                                                                                     | <p>Largely inadequate, significant issues</p> | <p>Somewhat adequate</p> | <p>Mostly adequate, few/minor issues</p> | <p>Completely adequate</p>                                                                                         | <p>i.e. is the proposed relationship between the IV and the DV well defined?<br/><i>Mediator:</i><br/>intrinsic to the causal process, is a third variable that varies with the IV and explains the relationship between the IV and the DV<br/><i>Moderator:</i><br/>the direction or magnitude of the relationship</p> |

| Questions                                                                                                              | Anchor Definition                                                                          |                    |                                                                                                                  |                     |                                                                              | Further clarification                               |
|------------------------------------------------------------------------------------------------------------------------|--------------------------------------------------------------------------------------------|--------------------|------------------------------------------------------------------------------------------------------------------|---------------------|------------------------------------------------------------------------------|-----------------------------------------------------|
| selection bias in terms of measuring the types of effects (e.g. choosing only those outcomes thought to be favorable)? |                                                                                            |                    |                                                                                                                  |                     |                                                                              | between the IV and the DV depends on the moderator  |
| <b>SECTION TWO</b>                                                                                                     | <b>Min (1)</b>                                                                             | <b>Mid-low (2)</b> | <b>Mid (3)</b>                                                                                                   | <b>Mid-high (4)</b> | <b>Max (5)</b>                                                               | <b>Further clarification</b>                        |
| 6. To what degree do deficiencies in design impact the conclusions? (pre/post designs getting the worst scores)        | Pre/post, no evidence of group assessment (Strongly invalidates)                           |                    | Pre/post, group analyses (Somewhat invalidates)                                                                  |                     | Randomized Control Trial (Very little effect)                                | Focusing on the <i>validity</i> of the conclusions. |
| 7. To what degree do differences in the type of <u>clinicians</u> between study groups impact the conclusions?         | Subjects in each group fundamentally differ, cannot be compared (Strongly invalidates)     |                    | Subjects in each group differ somewhat, comparison moderately impacts conclusion validity (Somewhat invalidates) |                     | Subjects in both groups are identical, fully comparable (Very little effect) | Focusing on the <i>validity</i> of the conclusions. |
| 8. To what degree do differences in the <u>technology implementation</u> between study groups impact the conclusions?  | Significant differences in implementation preclude group comparison (Strongly invalidates) |                    | Minor differences in implementation hinder group comparison (Somewhat invalidates)                               |                     | Technological implementation is identical, comparable (Very little effect)   | Focusing on the <i>validity</i> of the conclusions. |

| Questions                                                                                                                 | Anchor Definition                                                                                           |  |                                                                                          |  | Further clarification                                                                                   |                                                                                                                                                                                                                                                                                                                                                                 |
|---------------------------------------------------------------------------------------------------------------------------|-------------------------------------------------------------------------------------------------------------|--|------------------------------------------------------------------------------------------|--|---------------------------------------------------------------------------------------------------------|-----------------------------------------------------------------------------------------------------------------------------------------------------------------------------------------------------------------------------------------------------------------------------------------------------------------------------------------------------------------|
| 9. To what degree do differences in the way that groups were treated during the study period impact the conclusions?      | Significantly different treatment, clear impact on conclusion validity (Strongly invalidates)               |  | Treatment differs somewhat, limited impact on conclusion validity (Somewhat invalidates) |  | Identical treatment, no influence on conclusion validity (Very little effect)                           | <i>Examples of issues that can arise for studies with a control group and a treatment group:</i><br>- Compensatory rivalry (when control subjects compare themselves with those treated and are motivated to do as well)<br>- Resentful demoralization (when controls compare themselves to those treated and feel so helpless or deprived that they do poorly) |
| 10. To what degree do differences in the way that measurements were taken during the study period impact the conclusions? | Inconsistent method of measurement, significant impact on conclusion validity (Strongly invalidates)        |  | Somewhat invalidates                                                                     |  | Consistent method of measurement, no impact on conclusion validity (Very little effect)                 |                                                                                                                                                                                                                                                                                                                                                                 |
| 11. To what degree did the measurement of the dependent variables impact the conclusions? (reliability, validity,         | Inappropriate or insufficient measurement, construct of interest is underrepresented (Strongly invalidates) |  | Somewhat invalidates                                                                     |  | Appropriate and sufficient measurement, construct of interest is fully represented (Very little effect) | <i>Does the measurement procedure used affect construct validity?</i><br>- the use of a single measure for a given construct presents a threat to construct validity,                                                                                                                                                                                           |

| Questions                                                                                                                                                 | Anchor Definition                                                                                     |  |                                                                                      |  |                                                                                                    | Further clarification                                                                                                                                                                                                                                          |
|-----------------------------------------------------------------------------------------------------------------------------------------------------------|-------------------------------------------------------------------------------------------------------|--|--------------------------------------------------------------------------------------|--|----------------------------------------------------------------------------------------------------|----------------------------------------------------------------------------------------------------------------------------------------------------------------------------------------------------------------------------------------------------------------|
| floor and ceiling effects)                                                                                                                                |                                                                                                       |  |                                                                                      |  |                                                                                                    | potentially underrepresenting the construct being measured - is there a clear link between the construct of interest and the measures used to operationalize it (i.e. measure it)?                                                                             |
| 12. To what degree did inappropriate unit of analysis impact the conclusions? (e.g. using a patient level analysis when provider behavior was the target) | Inappropriate unit of analysis, e.g. patient when target is provider behaviour (Strongly invalidates) |  | Appropriate but non-ideal unit of analysis (Somewhat invalidates)                    |  | Fully appropriate, ideal unit of analysis (Very little effect)                                     | <i>Unit of analysis:</i> the major entity that is being analyzed in a study. It is the 'what' or 'who' that is being studied.                                                                                                                                  |
| 13. To what degree did the way that confounders were included in the statistical analysis impact the conclusions?                                         | Confounders were not acknowledged or accounted for (Strongly invalidates)                             |  | Confounders were identified but inappropriately accounted for (Somewhat invalidates) |  | No confounders OR confounders were identified and appropriately accounted for (Very little effect) | <i>Identifying confounders:</i> Is there academic evidence that the extraneous variables you can identify affect the dependent variable? Are there any logical or practical reasons to assume that an extraneous variable might become a confounding variable? |

| Questions                                                                             | Anchor Definition                                                                                                                                                |  |                                                                                                       |  | Further clarification                                                                                                        |                                                                                                                                                                                                                                                    |
|---------------------------------------------------------------------------------------|------------------------------------------------------------------------------------------------------------------------------------------------------------------|--|-------------------------------------------------------------------------------------------------------|--|------------------------------------------------------------------------------------------------------------------------------|----------------------------------------------------------------------------------------------------------------------------------------------------------------------------------------------------------------------------------------------------|
| 14. To what degree did possible problems with missing data impact the conclusions?    | Incompleteness of data is explicit, significant impact on conclusions (Strongly invalidates)                                                                     |  | Completeness of data is not explicit but no evidence of missing data effect (Somewhat invalidates)    |  | Completeness of data is explicit, no impact on conclusions (Very little effect)                                              |                                                                                                                                                                                                                                                    |
| 15. To what degree did the type of statistical analysis done impact the conclusions?  | Inappropriate test applied, test conditions violated, or no statistical analysis performed; significant effect on validity of conclusions (Strongly invalidates) |  | Issues with statistical analysis but limited impact on validity of conclusions (Somewhat invalidates) |  | Appropriate test applied, test conditions met, no impact on validity of conclusions (Very little effect)                     | Includes violating assumptions of tests (e.g. violated normality assumption, homogeneity, etc.)                                                                                                                                                    |
| 16. To what degree did “fishing” or conducting multiple tests impact the conclusions? | Multiple tests applied; tests do not align with original hypothesis; significant impact on conclusion validity (Strongly invalidates)                            |  | Data fishing suspected, some impact on conclusion validity (Somewhat invalidates)                     |  | Limited number of tests applied; tests align with original hypothesis; no impact on conclusion validity (Very little effect) | <i>Data fishing:</i> Searching for data to fit preconceived ideas; the inappropriate search for statistically significant relationships.<br><br>Performing multiple analyses without adjusting the significance level or using sequential designs. |
| 17. To what degree are the study results generalizable?                               | Results are not robust, cannot be generalized (Strongly invalidates)                                                                                             |  | Results are robust, can be generalized to some extent (Somewhat invalidates)                          |  | Results are robust, can be generalized to a great extent (Very little effect)                                                | Can the findings be generalized to a wider population, or across populations, treatments, contexts/settings, or time, etc.?                                                                                                                        |

| Questions                                          | Anchor Definition                                         |  |                                                             |  |                                                        | Further clarification                                                                                                                                                                                                                                 |
|----------------------------------------------------|-----------------------------------------------------------|--|-------------------------------------------------------------|--|--------------------------------------------------------|-------------------------------------------------------------------------------------------------------------------------------------------------------------------------------------------------------------------------------------------------------|
|                                                    |                                                           |  |                                                             |  |                                                        | <p><i>To assess the extent to which generalisations can be made: must consider how well the sample (or population) represents the wider population (or settings/contexts, treatments or time) we are interested in making generalisations to.</i></p> |
| 18. Do the conclusions match the results reported? | Results do not support conclusions (Strongly invalidates) |  | Results somewhat support conclusions (Somewhat invalidates) |  | Results fully support conclusions (Very little effect) |                                                                                                                                                                                                                                                       |



## eReferences

1. Peute LW, Driest KF, Marcilly R, Bras Da Costa S, Beuscart-Zephir MC, Jaspers MW. A framework for reporting on human factor/usability studies of health information technologies. *Stud Health Technol Inform* 2013;194:54-60.
2. Weir CR, Stagers N, Phansalkar S. The state of the evidence for computerized provider order entry: a systematic review and analysis of the quality of the literature. *International journal of medical informatics* 2009;78(6):365-374.
